# Supplementary material
Source: PubMed Central journal article supplement (PMC3023551)
Supplement: supp_M010173_jlr.M010173-1.pdf [file supp_M010173_jlr.M010173-1.pdf]

**Supplemental Table**

Summary of MALDI-TOF MS analysis of the isolated glycosphingolipids from *A. franciscana*.

| <sup>a</sup> FA - LCB | CMS                |        | CDS    |        | nAtCTS  |         | AtCTS   |         |
|-----------------------|--------------------|--------|--------|--------|---------|---------|---------|---------|
|                       | <sup>b</sup> Calc. | Found  | Calc.  | Found  | Calc.   | Found   | Calc.   | Found   |
| 16:0 - d16:1          | 694.52             | 694.73 | 856.58 | 856.60 | 1002.63 | 1002.62 | 1059.66 | 1059.56 |
| 16:0 - d17:1          | 708.54             | 708.74 | 870.59 | 870.61 | 1016.65 | 1016.64 | 1073.67 | 1073.61 |
| 2h16:0 - d16:1        | 710.52             | 710.73 |        |        |         |         |         |         |
| 18:0 - d16:1          | 722.56             | 722.78 | 884.61 | 884.62 | 1030.67 | 1030.67 | 1087.69 | 1087.62 |
| 18:0 - d17:1          | 736.57             | 736.79 | 898.62 | 898.64 | 1044.68 | 1044.68 | 1101.70 | 1101.63 |
| 19:0 - d16:1          | 736.57             | 736.79 |        |        | 1044.68 | 1044.68 |         |         |
| 2h18:0 - d16:1        | 738.55             | 738.77 |        |        |         |         |         |         |
| 20:0 - d16:1          | 750.59             | 750.80 | 912.64 | 912.65 | 1058.70 | 1058.70 | 1115.72 | 1115.65 |
| 2h18:0 - d17:1        | 752.57             | 752.79 |        |        |         |         |         |         |
| 20:0 - d17:1          | 764.60             | 764.83 | 926.65 | 926.67 | 1072.71 | 1072.72 | 1129.73 | 1129.67 |
| 21:0 - d16:1          | 764.60             | 764.83 | 926.65 | 926.67 | 1072.71 | 1072.72 | 1129.73 | 1129.67 |
| 2h20:0 - d16:1        | 766.58             | 766.82 |        |        |         |         |         |         |
| 22:1 - d16:1          | 776.60             | 776.85 | 938.65 | 938.68 | 1084.71 | 1084.72 | 1141.73 | 1141.68 |
| 22:0 - d16:1          | 778.62             | 778.86 | 940.67 | 940.69 | 1086.73 | 1086.73 | 1143.75 | 1143.69 |
| 22:1 - d17:1          | 790.62             | 790.86 | 952.67 | 952.68 | 1098.73 | 1098.72 | 1155.75 | 1155.68 |
| 22:0 - d17:1          | 792.63             | 792.87 | 954.69 | 954.70 | 1100.74 | 1100.74 | 1157.77 | 1157.69 |
| 23:0 - d16:1          | 792.63             | 792.87 | 954.69 | 954.70 | 1100.74 | 1100.74 | 1157.77 | 1157.69 |
| 2h22:0 - d16:1        | 794.61             | 794.86 |        |        |         |         |         |         |
| 24:1 - d16:1          | 804.63             | 804.87 | 966.69 | 966.69 | 1112.74 | 1112.72 | 1169.77 | 1169.67 |
| 23:0 - d17:1          | 806.65             | 806.89 | 968.70 | 968.71 | 1114.76 | 1114.73 | 1171.78 | 1171.69 |
| 24:0 - d16:1          | 806.65             | 806.89 | 968.70 | 968.71 | 1114.76 | 1114.73 | 1171.78 | 1171.69 |
| 2h22:0 - d17:1        | 808.63             | 808.86 |        |        |         |         |         |         |
| 24:1 - d17:1          | 818.65             | 818.89 | 980.70 | 980.71 | 1126.76 | 1126.71 | 1183.78 | 1183.67 |
| 24:0 - d17:1          | 820.66             | 820.90 | 982.72 | 982.72 | 1128.78 | 1128.74 | 1185.80 | 1185.70 |

| FA - LCB     | nAtCTeS |         | AtCTeS  |         | CPS     |         | CHS     |         |
|--------------|---------|---------|---------|---------|---------|---------|---------|---------|
|              | Calc.   | Found   | Calc.   | Found   | Calc.   | Found   | Calc.   | Found   |
| 16:0 - d16:1 | 1205.71 | 1205.83 | 1262.74 | 1262.75 | 1408.79 |         | 1611.87 | 1611.45 |
| 16:0 - d17:1 | 1219.73 | 1219.86 | 1276.75 | 1276.76 | 1422.81 | 1423.00 | 1625.89 | 1625.45 |
| 18:0 - d16:1 | 1233.75 | 1233.88 | 1290.77 | 1290.78 | 1436.82 | 1437.05 | 1639.90 | 1639.49 |
| 18:0 - d17:1 | 1247.76 | 1247.89 | 1304.78 | 1304.80 | 1450.84 | 1451.06 | 1653.92 | 1653.50 |
| 19:0 - d16:1 | 1247.76 | 1247.89 |         |         |         |         |         |         |
| 20:0 - d16:1 | 1261.78 | 1261.91 | 1318.80 | 1318.81 | 1464.86 | 1465.10 | 1667.94 | 1667.52 |
| 20:0 - d17:1 | 1275.79 | 1275.94 | 1332.81 | 1332.83 | 1478.87 | 1479.14 | 1681.95 | 1681.53 |
| 21:0 - d16:1 | 1275.79 | 1275.94 | 1332.81 | 1332.83 | 1478.87 | 1479.14 | 1681.95 | 1681.53 |
| 22:1 - d16:1 | 1287.79 | 1287.94 | 1344.81 | 1344.84 | 1490.87 | 1491.19 | 1693.95 | 1693.53 |
| 22:0 - d16:1 | 1289.81 | 1289.95 | 1346.83 | 1346.84 | 1492.89 | 1493.18 | 1695.97 | 1695.54 |
| 22:1 - d17:1 | 1301.81 | 1301.94 | 1358.83 | 1358.84 | 1504.89 | 1505.16 | 1707.97 | 1707.53 |
| 22:0 - d17:1 | 1303.82 | 1303.96 | 1360.84 | 1360.85 | 1506.90 | 1507.16 | 1709.98 | 1709.55 |
| 23:0 - d16:1 | 1303.82 | 1303.96 | 1360.84 | 1360.85 | 1506.90 | 1507.16 | 1709.98 | 1709.55 |
| 24:1 - d16:1 | 1315.82 | 1315.95 | 1372.84 | 1372.84 | 1518.90 | 1519.13 | 1721.98 | 1721.55 |
| 23:0 - d17:1 | 1317.84 | 1317.95 | 1374.86 | 1374.85 | 1520.92 | 1521.14 | 1724.00 | 1723.55 |
| 24:0 - d16:1 | 1317.84 | 1317.95 | 1374.86 | 1374.85 | 1520.92 | 1521.14 | 1724.00 | 1723.55 |
| 24:1 - d17:1 | 1329.84 | 1329.96 | 1386.86 | 1386.84 | 1532.92 | 1533.15 | 1736.00 | 1735.55 |
| 24:0 - d17:1 | 1331.85 | 1331.96 | 1388.88 | 1388.87 | 1534.93 | 1535.15 | 1738.01 | 1737.55 |

<sup>a</sup>2h, 2-hydroxy. <sup>b</sup>Calc. means calculated as the monoisotopic mass of a sodium adducted ion ([M+Na]<sup>+</sup>).
